# Supplementary material for: Regulated Phase Separation in Al–Ti–Cu–Co Alloys through Spark Plasma Sintering Process
Source: MDPI journal article supplement (doi:10.3390/ma17020304), 2024-01-07
Supplement: s1 [file s1]

## Supplementary Information

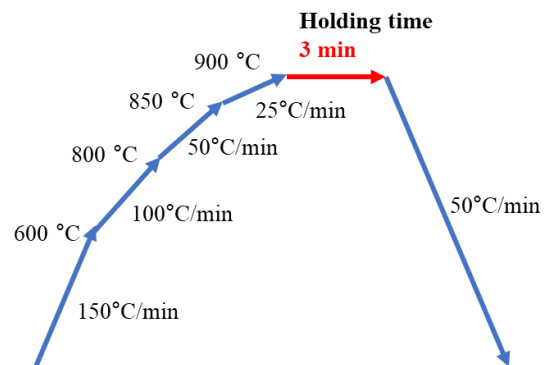

**Figure S1** Heating and cooling profile during SPS.

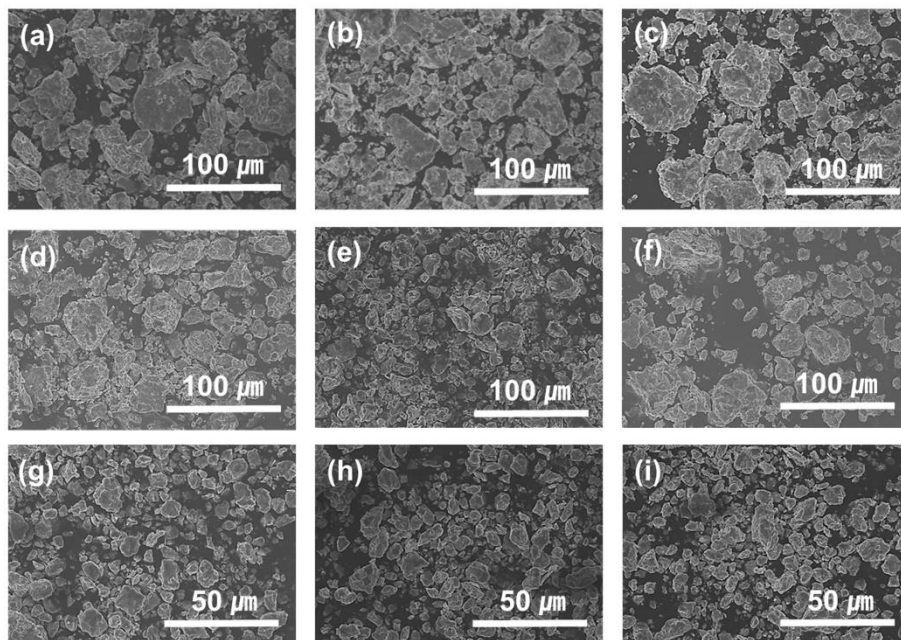

**Figure S2** SEM images of ball-milled Al-Ti-Cu-Co powders at (a-c) 5 h, (d-f) 7 h, (g-i) 15 h.
